# Supplementary material
Source: HighWire-hosted journal article supplement (https://bmjopen.bmj.com/content/8/8/e019741)
Supplement: inline-supplementary-material-1 [file inline-supplementary-material-1.pdf]

Supplementary Table 1. ICD-9-CM code used in the current study

| Variable                              | Code                                                                                                                                                                  |
|---------------------------------------|-----------------------------------------------------------------------------------------------------------------------------------------------------------------------|
| Acute myocardial infarction           | 410.xx                                                                                                                                                                |
| Aortic valve disease                  | 424.1                                                                                                                                                                 |
| Pericardial disease                   | 423.xx                                                                                                                                                                |
| Congenital heart disease              | 745.xx–747.xx (Catastrophic illness card)                                                                                                                             |
| Venous thromboembolism                | 415.1x, 453.xx                                                                                                                                                        |
| Dialysis                              | 585.xx (Catastrophic illness card)                                                                                                                                    |
| Hypertrophic cardiomyopathy           | 425.1x                                                                                                                                                                |
| Hypertension                          | 401.xx–405.xx                                                                                                                                                         |
| Hyperlipidemia                        | 272.xx                                                                                                                                                                |
| Diabetes mellitus                     | 250.xx                                                                                                                                                                |
| Heart failure                         | 428.xx                                                                                                                                                                |
| Stroke                                | 430.xx–437.xx                                                                                                                                                         |
| Chronic kidney disease                | 580.xx–589.xx, 403.xx–404.xx, 016.0x,<br>095.4x, 236.9x, 250.4x, 274.1x, 442.1x,<br>447.3x, 440.1x, 572.4x, 642.1x, 646.2x,<br>753.1x, 283.11, 403.01, 404.02, 446.21 |
| Carotid artery disease                | 433.1x                                                                                                                                                                |
| Peripheral artery disease             | 440.0x, 440.2x, 440.3x, 440.8x, 440.9x,<br>443.xx, 444.0x, 444.22, 444.8x, 447.8x,<br>447.9x                                                                          |
| Atrial fibrillation/atrial flutter    | 427.31, 427.32                                                                                                                                                        |
| Chronic obstructive pulmonary disease | 491.xx, 492.xx, 496.xx                                                                                                                                                |
| Peptic ulcer disease                  | 531.xx–534.xx                                                                                                                                                         |
| Liver cirrhosis                       | 571.2x, 571.5x, 571.6x                                                                                                                                                |
| Malignancy                            | 140.xx–208.xx                                                                                                                                                         |
| Gout                                  | 274.xx                                                                                                                                                                |
| Atrial fibrillation                   | 427.31                                                                                                                                                                |
| Systemic thromboembolism              | 444.22, 444.81, 444.21, 557.0, 557.9, 557.1,<br>593.81, 444.89, 433.8, 444.9x, 415.1x,<br>433.xx, 434.xx, 435.xx, 436.xx, 437.xx                                      |

Supplementary Table 2. Intervention and medication during the index admission after propensity score matching without matching the index date (sensitivity analysis I)

| Variable                            | HCM<br>(n = 257) | Non-HCM<br>(n = 1,028) | P value# |
|-------------------------------------|------------------|------------------------|----------|
| <b>Intervention</b>                 |                  |                        |          |
| Intubation                          | 41 (16.0)        | 247 (24.0)             | 0.005*   |
| Intraaortic balloon pump            | 4 (1.6)          | 65 (6.3)               | 0.002*   |
| Extracorporeal membrane oxygenation | 1 (0.4)          | 11 (1.1)               | 0.310    |
| Temporary hemodialysis              | 5 (1.9)          | 44 (4.3)               | 0.080    |
| Cardiac rehabilitation              | 8 (3.1)          | 46 (4.5)               | 0.330    |
| <b>Medications during admission</b> |                  |                        |          |
| Aspirin                             | 196 (76.3)       | 761 (74.0)             | 0.462    |
| Clopidogrel                         | 120 (46.7)       | 528 (51.4)             | 0.181    |
| ACEI/ARB                            | 141 (54.9)       | 582 (56.6)             | 0.613    |
| Beta blocker                        | 135 (52.5)       | 454 (44.2)             | 0.016*   |
| Calcium channel blocker             | 70 (27.2)        | 225 (21.9)             | 0.068    |
| Diuretics                           | 80 (31.1)        | 330 (32.1)             | 0.765    |
| Spirolactone                        | 19 (7.4)         | 92 (8.9)               | 0.427    |
| Nitrates                            | 51 (19.8)        | 228 (22.2)             | 0.417    |
| Warfarin                            | 18 (7.0)         | 52 (5.1)               | 0.219    |
| Statin                              | 49 (19.1)        | 223 (21.7)             | 0.357    |
| Proton pump inhibitor               | 30 (11.7)        | 118 (11.5)             | 0.930    |

\* Denotes  $P < 0.05$ .

ACEI, angiotensin converting enzyme inhibitor; ARB, angiotensin receptor blocker.

# Adjusted for year of index admission.

Supplementary Table 3. In-hospital cardiovascular outcome after propensity score matching without matching the index date (sensitivity analysis I)

| Variable                         | HCM<br>(n = 257) | Non-HCM<br>(n = 1,028) | HCM vs. Non-HCM#    |         |
|----------------------------------|------------------|------------------------|---------------------|---------|
|                                  |                  |                        | OR / B (95% CI)     | P value |
| PCI                              | 45 (17.5)        | 311 (30.3)             | 0.49 (0.34, 0.70)   | <0.001* |
| Number of intervened vessels     |                  |                        |                     |         |
| 0 vessel                         | 212 (82.5)       | 717 (69.7)             | Reference           | –       |
| 1 vessel                         | 34 (13.2)        | 226 (22.0)             | 0.51 (0.34, 0.76)   | <0.001* |
| 2 vessels                        | 10 (3.9)         | 57 (5.5)               | 0.60 (0.30, 1.20)   | 0.146   |
| 3 vessels                        | 1 (0.4)          | 28 (2.7)               | 0.12 (0.02, 0.86)   | 0.035*  |
| PCI with stenting                | 16 (6.2)         | 181 (17.6)             | 0.30 (0.17, 0.51)   | <0.001* |
| CABG                             | 2 (0.8)          | 31 (3.0)               | 0.26 (0.06, 1.10)   | 0.067   |
| Valvular surgery                 | 3 (1.2)          | 6 (0.6)                | 2.06 (0.50, 8.49)   | 0.315   |
| Pacing device implantation†      | 7 (2.7)          | 3 (0.3)                | 9.68 (2.43, 38.47)  | 0.001*  |
| New onset of atrial fibrillation | 35 (13.6)        | 32 (3.1)               | 5.15 (3.09, 8.57)   | <0.001* |
| New onset of VTE                 | 16 (6.2)         | 55 (5.4)               | 1.28 (0.72, 2.29)   | 0.405   |
| Shock                            | 75 (29.2)        | 433 (42.1)             | 0.58 (0.43, 0.78)   | <0.001* |
| In-hospital death                | 28 (10.9)        | 223 (21.7)             | 0.44 (0.29, 0.67)   | <0.001* |
| ICU days                         | 4.4±7.2          | 4.6±7.8                | -0.24 (-1.29, 0.81) | 0.824   |
| Length of stay                   | 13.7±25.1        | 12.9±20.1              | 0.78 (-2.11, 3.68)  | 0.550   |

\* Denotes  $P < 0.05$ .

B, regression coefficient; CABG, coronary artery bypass graft; CI, confidence interval; ICU, intensive care unit; OR, odds ratio; PCI, percutaneous coronary intervention; VTE, venous thromboembolism.

† Includes pacemaker and implantable cardioverter defibrillator.

# Adjusted for year of index admission.

Supplementary Table 4. Outcome during the follow up after propensity score matching without matching the index date (sensitivity analysis I)

| Variable                | HCM<br>( <i>n</i> = 257) | Non-HCM<br>( <i>n</i> = 1,028) | HCM vs. Non-HCM#  |                |
|-------------------------|--------------------------|--------------------------------|-------------------|----------------|
|                         |                          |                                | HR (95% CI)       | <i>P</i> value |
| 1 year follow up        |                          |                                |                   |                |
| Recurrent AMI           | 13 (5.1)                 | 69 (6.7)                       | 0.70 (0.38, 1.28) | 0.249          |
| HF hospitalization      | 17 (6.6)                 | 61 (5.9)                       | 1.10 (0.65, 1.88) | 0.717          |
| Systemic VTE            | 23 (8.9)                 | 63 (6.1)                       | 2.62 (1.06, 6.48) | 0.036*         |
| Heart transplant        | 0 (0.0)                  | 0 (0.0)                        | NA                | NA             |
| All-cause mortality     | 72 (28.0)                | 407 (39.6)                     | 0.59 (0.46, 0.76) | <0.001*        |
| CV death                | 46 (17.9)                | 217 (21.1)                     | 0.74 (0.54, 1.02) | 0.067          |
| At the end of follow up |                          |                                |                   |                |
| Recurrent AMI           | 23 (8.9)                 | 100 (9.7)                      | 0.86 (0.54, 1.37) | 0.528          |
| HF hospitalization      | 35 (13.6)                | 101 (9.8)                      | 1.41 (0.96, 2.07) | 0.083          |
| Systemic VTE            | 39 (15.2)                | 108 (10.5)                     | 1.77 (1.09, 2.88) | 0.022*         |
| Heart transplant        | 0 (0.0)                  | 0 (0.0)                        | NA                | NA             |
| All-cause mortality     | 159 (61.9)               | 604 (58.8)                     | 0.82 (0.69, 0.98) | 0.031*         |
| CV death                | 62 (24.1)                | 246 (23.9)                     | 0.84 (0.63, 1.11) | 0.220          |

\* Denoted  $P < 0.05$ .

AMI, acute myocardial infarction; HR, hazard ratio; CI, confidence interval; CV, cardiovascular; HF, heart failure; VTE, venous thromboembolism; NA = not applicable.

#Additional adjusted for percutaneous coronary intervention, coronary artery bypass graft and pacing device during the index admission and the index year.

The analysis considers death as a competing risk except for all-cause mortality and CV death.

Supplementary Table 5. Intervention and medication during the index admission using multivariable regression adjustment (sensitivity analysis II)#

| Variable                            | HCM<br>(n = 257) | Non-HCM<br>(n = 176,801) | P value |
|-------------------------------------|------------------|--------------------------|---------|
| <b>Intervention</b>                 |                  |                          |         |
| Intubation                          | 41 (16.0)        | 34,182 (19.3)            | 0.170   |
| Intraaortic balloon pump            | 4 (1.6)          | 11,882 (6.7)             | 0.001*  |
| Extracorporeal membrane oxygenation | 1 (0.4)          | 932 (0.5)                | 0.760   |
| Temporary hemodialysis              | 5 (1.9)          | 5,877 (3.3)              | 0.218   |
| Cardiac rehabilitation              | 8 (3.1)          | 8,076 (4.6)              | 0.264   |
| <b>Medications during admission</b> |                  |                          |         |
| Aspirin                             | 196 (76.3)       | 139,396 (78.8)           | 0.312   |
| Clopidogrel                         | 120 (46.7)       | 98,802 (55.9)            | 0.003*  |
| ACEI/ARB                            | 141 (54.9)       | 106,910 (60.5)           | 0.066   |
| Beta blocker                        | 135 (52.5)       | 87,549 (49.5)            | 0.335   |
| Calcium channel blocker             | 70 (27.2)        | 35,653 (20.2)            | 0.005*  |
| Diuretics                           | 80 (31.1)        | 48,383 (27.4)            | 0.176   |
| Spironolactone                      | 19 (7.4)         | 13,274 (7.5)             | 0.944   |
| Nitrates                            | 51 (19.8)        | 41,146 (23.3)            | 0.194   |
| Warfarin                            | 18 (7.0)         | 6,388 (3.6)              | 0.004*  |
| Statin                              | 49 (19.1)        | 50,907 (28.8)            | 0.001*  |
| Proton pump inhibitor               | 30 (11.7)        | 14,352 (8.1)             | 0.037*  |

\* Denotes  $P < 0.05$ .

ACEI, angiotensin converting enzyme inhibitor; ARB, angiotensin receptor blocker.

# Adjusted for sex, gender and 14 comorbidities listed in Table 1.

Supplementary Table 6. In-hospital cardiovascular outcome using multivariable regression adjustment (sensitivity analysis II)#

| Variable                         | HCM<br>(n = 257) | Non-HCM<br>(n = 176,801) | HCM vs. Non-HCM    |         |
|----------------------------------|------------------|--------------------------|--------------------|---------|
|                                  |                  |                          | OR / B (95% CI)    | P value |
| PCI                              | 45 (17.5)        | 73,391 (41.5)            | 0.44 (0.31, 0.61)  | <0.001* |
| Number of intervened vessels     |                  |                          |                    |         |
| 0 vessel                         | 212 (82.5)       | 103,410 (58.5)           | Reference          | –       |
| 1 vessel                         | 34 (13.2)        | 55,066 (31.1)            | 0.45 (0.31, 0.66)  | <0.001* |
| 2 vessels                        | 10 (3.9)         | 11,924 (6.7)             | 0.57 (0.30, 1.08)  | 0.085   |
| 3 vessels                        | 1 (0.4)          | 6,401 (3.6)              | 0.11 (0.02, 0.77)  | 0.026*  |
| PCI with stenting                | 16 (6.2)         | 39,233 (22.2)            | 0.31 (0.18, 0.53)  | <0.001* |
| CABG                             | 2 (0.8)          | 6,759 (3.8)              | 0.25 (0.06, 1.002) | 0.0503  |
| Valvular surgery                 | 3 (1.2)          | 756 (0.4)                | 2.12 (0.67, 6.69)  | 0.200   |
| Pacing device implantation†      | 7 (2.7)          | 549 (0.3)                | 8.04 (3.73, 17.31) | <0.001* |
| New onset of atrial fibrillation | 35 (13.6)        | 6,543 (3.7)              | 4.57 (3.15, 6.63)  | <0.001* |
| New onset of VTE                 | 16 (6.2)         | 7,242 (4.1)              | 1.50 (0.89, 2.52)  | 0.127   |
| Shock                            | 75 (29.2)        | 63,077 (35.7)            | 0.64 (0.49, 0.85)  | 0.002*  |
| In-hospital death                | 28 (10.9)        | 29,396 (16.6)            | 0.46 (0.30, 0.69)  | <0.001* |
| ICU days                         | 4.4±7.2          | 4.4±7.1                  | 0.04 (-0.81, 0.89) | 0.595   |
| Length of stay                   | 13.7±25.1        | 11.1±17.3                | 2.66 (0.60, 4.72)  | 0.360   |

\* Denotes  $P < 0.05$ .

B, regression coefficient; CABG, coronary artery bypass graft; CI, confidence interval; ICU, intensive care unit; OR, odds ratio; PCI, percutaneous coronary intervention; VTE, venous thromboembolism.

† Includes pacemaker and implantable cardioverter defibrillator.

# Adjusted for sex, gender and 14 comorbidities listed in Table 1.

Supplementary Table 7. Outcome during the follow up using multivariable regression adjustment (sensitivity analysis II)#

| Variable                | HCM<br>( <i>n</i> = 257) | Non-HCM<br>( <i>n</i> = 176,801) | HCM vs. Non-HCM   |                |
|-------------------------|--------------------------|----------------------------------|-------------------|----------------|
|                         |                          |                                  | HR (95% CI)       | <i>P</i> value |
| 1 year follow up        |                          |                                  |                   |                |
| Recurrent AMI           | 13 (5.1)                 | 13,774 (7.8)                     | 0.68 (0.38, 1.19) | 0.174          |
| HF hospitalization      | 17 (6.6)                 | 7,790 (4.4)                      | 0.98 (0.60, 1.60) | 0.946          |
| Systemic VTE            | 23 (8.9)                 | 9,496 (5.4)                      | 2.08 (1.12, 3.86) | 0.021*         |
| Heart transplant        | 0 (0.0)                  | 89 (0.1)                         | NA                | NA             |
| All-cause mortality     | 72 (28.0)                | 54,007 (30.5)                    | 0.69 (0.55, 0.87) | 0.002*         |
| CV death                | 46 (17.9)                | 29,667 (16.8)                    | 0.85 (0.64, 1.14) | 0.284          |
| At the end of follow up |                          |                                  |                   |                |
| Recurrent AMI           | 23 (8.9)                 | 20,316 (11.5)                    | 0.85 (0.56, 1.28) | 0.429          |
| HF hospitalization      | 35 (13.6)                | 15,708 (8.9)                     | 1.16 (0.82, 1.62) | 0.405          |
| Systemic VTE            | 39 (15.2)                | 18,155 (10.3)                    | 1.67 (1.13, 2.47) | 0.010*         |
| Heart transplant        | 0 (0.0)                  | 188 (0.1)                        | NA                | NA             |
| All-cause mortality     | 159 (61.9)               | 88,884 (50.3)                    | 0.93 (0.79, 1.08) | 0.338          |
| CV death                | 62 (24.1)                | 36,481 (20.6)                    | 0.93 (0.72, 1.19) | 0.539          |

\* Denoted  $P < 0.05$ .

AMI, acute myocardial infarction; HR, hazard ratio; CI, confidence interval; CV, cardiovascular; HF, heart failure; VTE, venous thromboembolism; NA = not applicable.

The analysis considers death as a competing risk except for all-cause mortality and CV death.

# Adjusted for sex, gender and 14 comorbidities listed in Table 1.

Supplementary Table 8. Outcome during the follow up after propensity score matching using classical Cox proportional hazard model (sensitivity analysis III)

| Variable                | HCM<br>( <i>n</i> = 257) | Non-HCM<br>( <i>n</i> = 1,028) | HCM vs. Non-HCM   |                |
|-------------------------|--------------------------|--------------------------------|-------------------|----------------|
|                         |                          |                                | HR (95% CI)       | <i>P</i> value |
| 1 year follow up        |                          |                                |                   |                |
| Recurrent AMI           | 13 (5.1)                 | 70 (6.8)                       | 0.63 (0.34, 1.16) | 0.136          |
| HF hospitalization      | 17 (6.6)                 | 66 (6.4)                       | 0.88 (0.52, 1.50) | 0.643          |
| Systemic VTE            | 23 (8.9)                 | 64 (6.2)                       | 1.31 (0.63, 2.71) | 0.473          |
| Heart transplant        | 0 (0.0)                  | 1 (0.1)                        | NA                | NA             |
| All-cause mortality     | 72 (28.0)                | 406 (39.5)                     | 0.66 (0.51, 0.85) | 0.001*         |
| CV death                | 46 (17.9)                | 211 (20.5)                     | 0.83 (0.60, 1.14) | 0.252          |
| At the end of follow up |                          |                                |                   |                |
| Recurrent AMI           | 23 (8.9)                 | 109 (10.6)                     | 0.72 (0.46, 1.14) | 0.165          |
| HF hospitalization      | 35 (13.6)                | 112 (10.9)                     | 1.10 (0.76, 1.62) | 0.609          |
| Systemic VTE            | 39 (15.2)                | 107 (10.4)                     | 1.38 (0.88, 2.17) | 0.162          |
| Heart transplant        | 0 (0.0)                  | 1 (0.1)                        | NA                | NA             |
| All-cause mortality     | 159 (61.9)               | 604 (58.8)                     | 0.97 (0.81, 1.16) | 0.732          |
| CV death                | 62 (24.1)                | 262 (25.5)                     | 0.89 (0.67, 1.17) | 0.401          |

\* Denoted  $P < 0.05$ .

AMI, acute myocardial infarction; HR, hazard ratio; CI, confidence interval; CV, cardiovascular; HF, heart failure; VTE, venous thromboembolism; NA = not applicable.
